# Supplementary material for: Low-frequency HIV-1 drug resistance mutations in antiretroviral naïve individuals in Botswana
Source: PubMed Central journal article supplement (PMC11132386; doi:10.1097/md.0000000000029577), 2022-07-15
Supplement: medi-101-e29577-s001.pdf [file medi-101-e29577-s001.pdf]

**Article title:** Low-frequency HIV-1 drug resistance mutations in antiretroviral naïve individuals in Botswana.

**First author:** Dorcas Maruapula

**Table S1.** Comparison of participant characteristics among samples included in analysis and those excluded

| <b>Characteristics</b>                                 | <b>Included individuals<br/>(n=108)</b> | <b>Excluded individuals<br/>(n=423)</b> | <b>P-value</b> |
|--------------------------------------------------------|-----------------------------------------|-----------------------------------------|----------------|
| Female, n (%)                                          | 107 (99.1)                              | 370 (87.5)                              | <.001          |
| Male, n (%)                                            | 1 (0.9)                                 | 53 (12.5)                               | <.001          |
| Age in years, median (IQR)                             | 27 (24-31)                              | 26 (23-33)                              | .412           |
| Viral load (log <sub>10</sub> copies/mL), median (IQR) | 4.1 (3.5-4.6)                           | 4.2 (3.5-4.6)                           | .786           |
| CD4 count (cells/mm <sup>3</sup> ), median (IQR)       | 365 (225-497)                           | 427 (365-514)                           | <.01           |

IQR = (Interquartile ranges: 25th percentile and 75th percentile); Excluded Participants, refers to participants without available amplicons; Included Participants, refers to participant that had available amplicons and included in final analysis.

**Article title:** Low-frequency HIV-1 drug resistance mutations in antiretroviral naïve individuals in Botswana.

**First author:** Dorcas Maruapula

**Table S2:** Comparison of DRMs identified by Sanger sequencing, PASEq and Hydra

| PID | PASEq             |                                       |                      | Hydra         |                                       |                  | Sanger sequencing |       |          |
|-----|-------------------|---------------------------------------|----------------------|---------------|---------------------------------------|------------------|-------------------|-------|----------|
|     | NRTI              | NNRTI                                 | PI                   | NRTI          | NNRTI                                 | PI               | NRTI              | NNRTI | PI       |
| P1  | None              | Y181C<br>(1.25%)                      | None                 | None          | None                                  | None             | None              | None  | None     |
| P5  | None              | None                                  | T74P<br>(1.13%)      | None          | None                                  | None             | None              | None  | None     |
| P7  | None              | K103N<br>(98.7%),<br>V106M<br>(1.01%) | None                 | None          | K103N(97.8<br>3%)<br>V106I<br>(7.65%) | None             | None              | K103N | None     |
| P8  | M184V,<br>(2.48%) | E138G<br>(1.31%),<br>M230I<br>(2%)    | None                 | M184I(1.66%)  | E138G<br>(1.84%),<br>M230I<br>(2.25%) | None             | None              | None  | None     |
| P9  | None              | None                                  | M46I<br>(1.65%)      | None          | None                                  | M46I<br>(1.61%)  | None              | None  | None     |
| P10 | None              | None                                  |                      | K65R (1.12%)  | None                                  | None             | None              | None  | None     |
| P11 | None              | None                                  | L90M<br>(98.94<br>%) |               | None                                  | L90M<br>(99.24%) | None              | None  | L90<br>M |
| P13 | K65R (1.7%)       | None                                  | None                 | K65R (2.38%)  | None                                  | None             | None              | None  | None     |
| P14 | K65R (2%)         | None                                  | None                 | K65R (3.97%)  | None                                  | None             | None              | None  | None     |
| P15 | K65R<br>(1.23%)   | None                                  | None                 | None          | None                                  | None             | None              | None  | None     |
| P16 | None              | None                                  | M46I<br>(13.85<br>%) | None          | None                                  | M46I<br>(13.9%)  | None              | None  | None     |
| P17 | None              | P225H<br>(2%)                         | I84V<br>(3.03%)      | None          | P225H<br>(2.46%)                      | I84V<br>(2.64%)  | None              | None  | None     |
| P19 | None              | E138G<br>(4.65),<br>V108I<br>(11.25%) | N88S<br>(2.78%)      | None          | V108I(8.15<br>%)                      | N88S(4.15<br>%)  | None              | None  | None     |
| P21 | None              | None                                  | I84V<br>(1.11%)      | None          | None                                  |                  | None              | None  | None     |
| P23 | None              | None                                  | I50V<br>(1.33%)      | None          | None                                  | I50V(1.45<br>%)  | None              | None  | None     |
| P25 | M41L              | Y188H                                 | None                 | M41L (36.97%) | Y188H                                 | None             | M41               | K103N |          |

|     |                  |                               |                      |                                |                             |                  |      |       |      |
|-----|------------------|-------------------------------|----------------------|--------------------------------|-----------------------------|------------------|------|-------|------|
|     | (33.29%)         | (1.09%),<br>K103N<br>(97.56%) |                      |                                | (1.06%)<br>K103N<br>(98.8%) |                  | L    |       |      |
| P26 | K65R<br>(2.96%)  | None                          | None                 | K65R (3.74%)                   | None                        | None             | None | None  | None |
| P27 | K65R<br>(2.18%)  | None                          | M46I<br>(2.08%)      | None                           | None                        | M46I<br>(2.8%)   | None | None  | None |
| P28 | A62V<br>(98.99%) | None                          | None                 | A62V (99.38%)                  | None                        | None             | A62V | None  | None |
| P29 | Q58E<br>(65.68%) | V108I<br>(1.15%)              | None                 | Q58E (70.49%)                  | None                        | None             | None | None  | Q58E |
| P30 | None             | E138K<br>(1.12%)              | None                 | None                           | None                        | None             | None | None  | None |
| P31 | F116Y<br>(2.55%) | V108I<br>(3.55%)              | None                 | K65R (1.65%),<br>F116Y (1.98%) | V108I<br>(1.62%)            | None             | None | None  | None |
| P32 | V75I<br>(2.46%)  | None                          | None                 | V75I (2.64)                    | None                        | None             | None | None  | None |
| P34 | V75I (5.4%)      | None                          | None                 | K65R (2.56%),<br>V75I (5.03%)  | None                        | None             | None | None  | None |
| P36 | None             | None                          | M46L<br>(3.38%)      | None                           | None                        | M46L<br>(3.23%)  | None | None  | None |
| P38 | K65R (1%)        | None                          | Q58E<br>(99.71<br>%) | K65R (1.87)                    | None                        | Q58E<br>(99.32%) | None | None  | Q58E |
| P41 | None             | None                          | M46I<br>(1.66%)      | None                           | None                        | M46I<br>(1.19%)  | None | None  | None |
| P42 | K65R<br>(1.14%)  | None                          | None                 | K65R (1.63%)                   | None                        | None             | None | None  | None |
| P43 | F77L<br>(4.06%)  | None                          | None                 | F77L (5.39%)                   | None                        | None             | None | None  | None |
| P44 | M184I<br>(2.43%) | None                          | None                 | M184I (2.6%)                   | None                        | None             | None | None  | None |
| P45 | None             | E138K<br>(2.74%)              | None                 | None                           | None                        | None             | None | None  | None |
| P46 | None             | None                          | M46I<br>(9.1)        | None                           | None                        | M46I<br>(8.56%)  | None | None  | None |
| P47 | K65R<br>(1.23%)  | None                          |                      | K65R (1.51%)                   | None                        | None             | None | None  | None |
| P49 | None             | None                          | I50V<br>(1.07%)      | None                           | None                        | None             | None | None  | None |
| P51 | None             | Y188C<br>(2.231%)             | None                 | None                           | Y188C<br>(1.69%)            | None             | None | None  | None |
| P53 | None             | K103N<br>(7.769%)             | None                 | None                           | K103N<br>(6.93%)            | None             | None | None  | None |
| P56 | None             | None                          | None                 | K65R (1.32%)                   | None                        | None             | None | None  | None |
| P75 | None             | None                          | None                 | K65R (1.04%)                   | None                        | None             | None | None  | None |
| P85 | None             | K103N(81<br>.86%)             | None                 | K103N<br>(71.12%)              | None                        | None             | None | K103N | None |

|      |                  |      |      |             |      |                  |      |      |          |
|------|------------------|------|------|-------------|------|------------------|------|------|----------|
| P94  | M46L<br>(44.49%) | None | None | None        | None | M46L<br>(47.43%) | None | None | M46<br>L |
| P101 | None             | None | None | K65R (2.7%) | None | None             | None | None | None     |

DRMs = drug resistance mutations; NNRTI = non nucleoside reverse transcriptase inhibitor; NRTI = nucleoside reverse transcriptase inhibitor; PI = protease inhibitor; PID = patient identification; PAsEq = polymorphism analysis sequencing; None means no drug resistance mutations detected.

**Table S3:** Detailed ART regimens for individuals with follow-up data (n=82)

| PID        | Year of ART initiation   | Initiation regimen         |
|------------|--------------------------|----------------------------|
| P1         | 2014                     | ATRIPLA *                  |
| P3         | 2014                     | ATRIPLA*                   |
| P4         | 2014                     | ATRIPLA *                  |
| P5         | 2015                     | ATRIPLA *                  |
| P6         | 2015                     | ATRIPLA*                   |
| P8         | 2015                     | ATRIPLA*                   |
| P9         | 2016                     | ATRIPLA*                   |
| P10        | 2015                     | ATRIPLA                    |
| P11        | 2015                     | ATRIPLA*                   |
| P12        | 2015                     | ATRIPLA*                   |
| P13        | 2015                     | ATRIPLA*                   |
| P14        | 2015                     | ATRIPLA *                  |
| P16        | 2015                     | ATRIPLA *                  |
| P17        | 2015                     | ATRIPLA*                   |
| P18        | 2016                     | DTG + Truvada              |
| P19        | 2015                     | ATRIPLA*                   |
| P20        | 2016                     | DTG + Truvada              |
| P21        | 2015                     | ATRIPLA*                   |
| P22        | 2015                     | ATRIPLA                    |
| P23        | 2015                     | ATRIPLA*                   |
| <b>P26</b> | <b>2017</b>              | <b>DTG + Truvada</b>       |
| <b>P29</b> | <b>2015</b>              | <b>ATRIPLA</b>             |
| P30        | 2015                     | ATRIPLA*                   |
| P31        | 2015                     | ATRIPLA*                   |
| P32        | 2012                     | ATRIPLA                    |
| P33        | 2015                     | ATRIPLA                    |
| P34        | 2015                     | ATRIPLA                    |
| P35        | Missing initiation dates | Missing initiation regimen |
| P36        | 2015                     | ATRIPLA*                   |
| P37        | 2015                     | ATRIPLA*                   |
| P39        | 2015                     | ATRIPLA                    |
| P41        | 2015                     | ATRIPLA                    |
| P42        | 2015                     | ATRIPLA                    |
| P46        | 2015                     | ATRIPLA*                   |
| P47        | 2017                     | DTG + Truvada              |
| P48        | 2015                     | ATRIPLA                    |
| P49        | 2015                     | ATRIPLA*                   |
| P50        | 2015                     | ATRIPLA*                   |
| <b>P51</b> | <b>2016</b>              | <b>ATRIPLA</b>             |
| P52        | 2016                     | ATRIPLA                    |
| <b>P53</b> | <b>2012</b>              | <b>ATRIPLA *</b>           |
| P54        | 2018                     | DTG +Truvada               |
| P55        | 2015                     | ATRIPLA                    |
| P56        | 2017                     | DTG + Truvada              |
| P57        | 2015                     | ATRIPLA                    |
| P58        | 2015                     | ATRIPLA                    |

|            |                          |                            |
|------------|--------------------------|----------------------------|
| P59        | 2016                     | DTG + Truvada              |
| P60        | 2016                     | ATRIPLA *                  |
| P61        | Missing initiation dates | Missing initiation regimen |
| P62        | 2015                     | ATRIPLA*                   |
| <b>P63</b> | <b>2015</b>              | <b>ATRIPLA *</b>           |
| P64        | 2016                     | DTG + Truvada              |
| <b>P65</b> | <b>2016</b>              | <b>ATRIPLA *</b>           |
| P68        | 2016                     | ATRIPLA*                   |
| P69        | 2015                     | ATRIPLA*                   |
| P70        | 2015                     | ATRIPLA                    |
| P71        | 2016                     | DTG + Truvada *            |
| P73        | 2016                     | DTG + Truvada *            |
| P74        | 2012                     | ATRIPLA *                  |
| P75        | 2016                     | ATRIPLA                    |
| <b>P76</b> | <b>2012</b>              | <b>ATRIPLA *</b>           |
| P77        | 2017                     | DTG + Truvada              |
| <b>P78</b> | <b>2013</b>              | <b>ATRIPLA</b>             |
| P79        | 2016                     | DTG + Truvada *            |
| <b>P80</b> | <b>2016</b>              | <b>DTG + Truvada</b>       |
| <b>P81</b> | <b>2017</b>              | <b>DTG +Truvada *</b>      |
| <b>P82</b> | <b>2012</b>              | <b>ATRIPLA</b>             |
| <b>P83</b> | <b>2014</b>              | <b>ATRIPLA</b>             |
| P84        | 2014                     | ATRIPLA *                  |
| P86        | 2018                     | DTG +Truvada               |
| P87        | 2015                     | ATRIPLA                    |
| P89        | 2018                     | ATRIPLA                    |
| P91        | 2016                     | DTG + Truvada *            |
| P93        | 2015                     | ATRIPLA                    |
| P95        | 2015                     | ATRIPLA *                  |
| P97        | Missing initiation dates | Missing initiation regimen |
| P98        | 2015                     | ATRIPLA                    |
| P99        | 2017                     | DTG + Truvada              |
| P100       | 2015                     | ATRIPLA *                  |
| P101       | 2016                     | DTG + Truvada *            |
| P102       | 2015                     | ATRIPLA                    |
| P103       | 2015                     | ATRIPLA                    |

PID = Patient identification; ATRIPLA = TDF+FTC+EFV; DTG = dolutegravir; Truvada = TDF+FTC; \* Inferred initiation regimen based on initiation dates. Bold = Individuals who experienced virological failure (n=12).
